# Supplementary material for: Limited Service Availability, Readiness, and Use of Facility-Based Delivery Care in Haiti: A Study Linking Health Facility Data and Population Data
Source: PubMed Central journal article supplement (PMC5487087; doi:10.9745/ghsp-d-16-00311), 2017-06-27
Supplement: 16-00311-Wang-Supplementary-Table3.pdf [file 16-00311-Wang-Supplementary-Table3.pdf]

**SUPPLEMENTARY TABLE 3.** Characteristics of Women Who Have Had a Live Birth in the Five Years Preceding the Survey, Haiti DHS 2012

| Background Characteristics             | Rural        |              | Other Urban  |            | Metropolitan |              |
|----------------------------------------|--------------|--------------|--------------|------------|--------------|--------------|
|                                        | %            | N            | %            | N          | %            | N            |
| <b>Maternal age at birth</b>           |              |              |              |            |              |              |
| <20                                    | 13.7         | 396          | 13.8         | 115        | 15.3         | 186          |
| 20–34                                  | 65.3         | 1,879        | 71.9         | 596        | 69.4         | 843          |
| 35–49                                  | 21.0         | 604          | 14.3         | 118        | 15.2         | 185          |
| <b>Birth order</b>                     |              |              |              |            |              |              |
| 1                                      | 26.8         | 773          | 39.6         | 328        | 42.3         | 514          |
| 2–3                                    | 35.1         | 1,010        | 37.9         | 314        | 37.7         | 458          |
| 4–5                                    | 18.4         | 530          | 14.3         | 119        | 13.6         | 166          |
| 6+                                     | 19.7         | 566          | 8.1          | 67         | 6.4          | 78           |
| <b>Maternal education</b>              |              |              |              |            |              |              |
| None                                   | 26.8         | 772          | 8.8          | 73         | 8.5          | 103          |
| Primary                                | 48.1         | 1,384        | 34.5         | 286        | 32.1         | 390          |
| Secondary or higher                    | 25.1         | 722          | 56.7         | 470        | 59.4         | 721          |
| <b>Wealth quintile</b>                 |              |              |              |            |              |              |
| Lowest                                 | 36.4         | 1,046        | 0.0          | 0          | 0.0          | 0            |
| Second                                 | 34.4         | 991          | 0.7          | 6          | 0.3          | 4            |
| Middle                                 | 19.7         | 567          | 25.7         | 213        | 13.9         | 168          |
| Fourth                                 | 7.7          | 222          | 40.2         | 333        | 43.2         | 524          |
| Highest                                | 1.8          | 52           | 33.4         | 277        | 42.6         | 517          |
| <b>Number of antenatal care visits</b> |              |              |              |            |              |              |
| None                                   | 11.7         | 336          | 4.8          | 40         | 6.8          | 83           |
| 1                                      | 4.6          | 133          | 3.0          | 25         | 2.2          | 26           |
| 2–3                                    | 23.7         | 681          | 12.3         | 102        | 13.5         | 164          |
| 4+                                     | 60.0         | 1,726        | 78.4         | 650        | 75.9         | 921          |
| Don't know/missing                     | 0.1          | 3            | 1.4          | 12         | 1.6          | 19           |
| <b>Total</b>                           | <b>100.0</b> | <b>2,878</b> | <b>100.0</b> | <b>829</b> | <b>100.0</b> | <b>1,214</b> |

Abbreviation: DHS, Demographic and Health Survey.
